# Supplementary material for: Investigation of enhanced Am selectivity for Eu in solvent extraction using a BTPhen ligand substituted with halogen
Source: Royal Society of Chemistry journal article supplement (doi:10.1039/d2ra05515e), 2023-01-01
Supplement: d2ra05515e1.pdf [file d2ra05515e1.pdf]

## Supplementary Information

### Investigation of enhanced Am selectivity toward Eu in the solvent extraction using BTPPhen ligand substituted with halogen

Yuto Fukasawa<sup>a</sup> and Satoru Nakashima<sup>\*a, b</sup>

<sup>a</sup> Basic Chemistry Program, Graduate School of Advanced Science and Engineering, Hiroshima University, 1-3-1, Kagamiyama, Higashi-Hiroshima, Hiroshima 739-8526, Japan.

<sup>b</sup> Natural Science Center for Basic Research and Development (N-BARD), Hiroshima University, 1-4-2, Kagamiyama, Higashi-Hiroshima, Hiroshima 739-8526, Japan

#### Calculation of thermal correction to Gibbs free energy

Standard Gibbs energy ( $G$ ) can be explained as shown in eq. S1, i.e. the sum of total energy ( $E_{\text{tot}}$ ) and thermal correction to the Gibbs energy term ( $G_{\text{corr}}(T)$ ). The  $G_{\text{corr}}(T)$  can be divided into thermal correction to enthalpy term ( $H_{\text{corr}}(T)$ ) and entropy term ( $S(T)$ ) (eq. S2). The  $H_{\text{corr}}(T)$  also can be divided into zero-point energy ( $E_{\text{ZPE}}$ ), the contributions of vibration ( $E_{\text{vib}}(T)$ ), rotation ( $E_{\text{rot}}(T)$ ), translation ( $E_{\text{trans}}(T)$ ), and Boltzmann thermal distribution ( $k_{\text{B}}T$ ,  $k_{\text{B}}$  denotes Boltzmann constant), as shown in eq. S3. The  $S(T)$  also can be divided into the contributions of electron ( $S_{\text{ele}}$ ), vibration ( $S_{\text{vib}}(T)$ ), rotation, ( $S_{\text{rot}}(T)$ ) and translation ( $S_{\text{trans}}(T)$ ), as shown in eq. S4. The contributions of vibration and rotation to enthalpy and entropy are formulated based on harmonic oscillator and rigid rotator approximations, respectively. Quasi-harmonic approximation, which was the well-known breakdown of the harmonic oscillator model for Gibbs energies of low-frequency vibrational modes, was introduced in analyzing the vibrational enthalpy and entropy terms by raising the vibrational frequencies, which are less than  $60 \text{ cm}^{-1}$ . The derivation of formulas was referred to “Thermochemistry in Gaussian” by Ochterski [RS1].

$$G = E_{\text{tot}} + G_{\text{corr}}(T) \quad (\text{S1})$$

$$G_{\text{corr}}(T) = H_{\text{corr}}(T) - TS(T) \quad (\text{S2})$$

$$H_{\text{corr}}(T) = E_{\text{ZPE}} + E_{\text{vib}}(T) + E_{\text{rot}}(T) + E_{\text{trans}}(T) + k_{\text{B}}T \quad (\text{S3})$$

$$S(T) = S_{\text{ele}} + S_{\text{vib}}(T) + S_{\text{rot}}(T) + S_{\text{trans}}(T) \quad (\text{S4})$$

The symbols,  $E_{\text{ZPE}}$ ,  $E_{\text{vib}}(T)$ , and  $S_{\text{vib}}(T)$  in eqs. S3 and S4 are described in eqs. S5–S7, where  $\Theta_{\text{v}}(i) = hv_i/k_{\text{B}}$  ( $h$  and  $v_i$  mean Planck constant and frequency of  $i$ th normal vibrational mode, respectively) denotes characteristic vibrational temperature of  $i$ th normal vibrational frequency. The  $E_{\text{rot}}(T)$  of nonlinear molecules and  $E_{\text{trans}}(T)$  equal to  $(3/2)k_{\text{B}}T$ . The  $S_{\text{ele}}$  is considered to correspond to spin entropy of electrons generated from spin multiplet,  $2s + 1$  ( $s$  denotes spin quantum number), and equals to  $k_{\text{B}}\{\ln(2s + 1)\}$ . The  $S_{\text{rot}}(T)$  is described in eq. S8, where  $\Theta_{\text{r}}(t)$  and  $\sigma_{\text{r}}$  denote characteristic rotational temperature of  $t = x, y, z$  rotational axes and rotational symmetry number, respectively. The  $S_{\text{trans}}(T)$  is described in eq. S9, where  $m$  and  $P$  denote molecular weight and pressure, respectively.

$$E_{\text{ZPE}} = k_{\text{B}}\sum_i(\Theta_{\text{v}}(i)/2) \quad (\text{S5})$$

$$E_{\text{vib}}(T) = k_{\text{B}}\sum_i\Theta_{\text{v}}(i)\{\exp(\Theta_{\text{v},i}/T) - 1\}^{-1} \quad (\text{S6})$$

$$S_{\text{vib}}(T) = k_{\text{B}}\sum_i[(\Theta_{\text{v}}(i)/T)\{\exp(\Theta_{\text{v}}(i) - 1)\}^{-1} - \ln\{1 - \exp(-\Theta_{\text{v}}(i)/T)\}] \quad (\text{S7})$$

$$S_{\text{rot}}(T) = k_{\text{B}}[\ln(\pi^{1/2}/\sigma_{\text{r}})\{T^{3/2}(\Theta_{\text{r}}(x)\Theta_{\text{r}}(y)\Theta_{\text{r}}(z))^{-1/2}\} + 3/2] \quad (\text{S8})$$

$$S_{\text{translation}}(T) = k_{\text{B}}\{\ln(2\pi mk_{\text{B}}T/h^2)^{3/2}(k_{\text{B}}T/P) + 5/2\} \quad (\text{S9})$$

### Calculation details of SCF calculation

Segmented all-electron relativistically contracted basis sets (SARC basis sets) for Eu and Am were assigned as  $\{61^{17}/51^{11}/41^8/41^2\}$  and  $\{91^{20}/81^{12}/79^9/61^6\}$ , respectively. Self-consistent field (SCF) calculation was operated under the conductor-like polarizable continuum model (C-PCM). Angular grid points in the SCF calculations are set to Lebedev 194/no final grid for geometry optimization and Lebedev 302/434 as iteration/final grid for single point calculation. Integral accuracy parameters are set to 4.34 for geometry optimization and 4.67/5.61 for single-point calculation. Special grid was additionally constructed and applied for Eu and Am with an integral accuracy of 14.0 for improving the SCF energy precisions.

### Density of states analysis

We explain the analytical method of density of states (DOS) for partial DOS (PDOS) of all orbitals of Am or Eu atom and overlap population DOS (OPDOS) between Am or Eu d- and f-orbital, whose values were employed in Figure 3 and Figure 6. Mulliken population analysis method was applied for the analysis. The DOS values of the  $i$ th MO ( $N(i)$ ) is calculated by eq. S10, where  $P_{\mu\nu}$  and  $S_{\mu\nu}$  denote the density matrix and the overlap matrix between basis functions  $\psi_{\mu}$  and  $\psi_{\nu}$ , respectively.

$$N(i) = \sum_{\mu} \sum_{\nu} P_{\mu\nu}(i) S_{\mu\nu} \quad (\text{S10})$$

PDOS of metal *d*- or *f*-orbital corresponds to values when the both  $\psi_{\mu}$  and  $\psi_{\nu}$  functions belong to metal *d*- or *f*-orbitals. OPDOS corresponds to values when the  $\psi_{\mu}$  and  $\psi_{\nu}$  functions belong to metal *d*- or *f*-orbitals and atomic orbitals of the donor atoms of the ligands, respectively.

### Calculation of binding energy (BE) of metal centers

The BE ( $E_{\text{BE}}$ ) is defined in eq. S11 [RS2][RS3].

$$E_{\text{BE}} = E_{\text{comp}} - E_{\text{metal}} - E_{\text{ligands}} + E_{\text{BSSE}} \quad (\text{S11})$$

BSSE energy ( $E_{\text{BSSE}}$ ) is calculated using eq. S12.

$$E_{\text{BSSE}} = (E_{\text{metal}} + E_{\text{ligands}}) - (E'_{\text{metal}} + E'_{\text{ligands}}) \quad (\text{S12})$$

$E'_{\text{metal}}$  and  $E'_{\text{ligands}}$  mean single point electronic energy of metals with basis sets (so-called ghost orbitals) of ligands and that of ligands with basis sets of metal, respectively. Coordinations of metals and ligands are prepared by just removing ligands and metals, respectively, and any geometrical optimization is not operated. The results of calculations are shown in Table S5. The trend is shown in Figures S1 and S2.

### References

- RS1) J. W. Ochterski, *Thermochemistry in Gaussian, Gaussian Inc Pittsburgh PA*. 2000, **264**, 1–19.  
RS2) M. S. Islam, R. A. Pethrick, D. Pugh and M. J. Wilson, *J. Chem. Soc., Faraday Trans.*, 1997, **93**, 387-392.  
RS3) F. B. van Duijneveldt, J. G. C. M. van Duijneveldt-van de Rijdt, and J. H. van Lenthe, *Chem. Rev.* 1994, **94**, 1873-1885.

**Table S1** Numerical data of thermodynamic parameters (hartree)

| Compounds                                                 | $E_{\text{tot}}$ | $U_{\text{corr}}$ | $H_{\text{corr}}$ | $T^*S$ | $G_{\text{corr}}$ |
|-----------------------------------------------------------|------------------|-------------------|-------------------|--------|-------------------|
| Eu(H <sub>2</sub> O) <sub>9</sub>                         | -11765.921       | 152.757           | 153.350           | 41.703 | 111.647           |
| Am(H <sub>2</sub> O) <sub>9</sub>                         | -32770.995       | 152.762           | 153.355           | 42.424 | 110.930           |
| Eu(H <sub>2</sub> BTPhen)(NO <sub>3</sub> ) <sub>3</sub>  | -13049.524       | 209.901           | 210.494           | 52.810 | 157.684           |
| Am(H <sub>2</sub> BTPhen)(NO <sub>3</sub> ) <sub>3</sub>  | -34054.602       | 210.156           | 210.749           | 52.898 | 157.851           |
| Eu(BrHBTPhen)(NO <sub>3</sub> ) <sub>3</sub>              | -15668.898       | 204.849           | 205.441           | 55.322 | 150.119           |
| Am(BrHBTPhen)(NO <sub>3</sub> ) <sub>3</sub>              | -36673.976       | 204.778           | 205.371           | 55.274 | 150.097           |
| Eu(F <sub>2</sub> BTPhen)(NO <sub>3</sub> ) <sub>3</sub>  | -13248.229       | 201.159           | 201.751           | 55.431 | 146.320           |
| Am(F <sub>2</sub> BTPhen)(NO <sub>3</sub> ) <sub>3</sub>  | -34253.307       | 201.237           | 201.830           | 55.630 | 146.199           |
| Eu(Cl <sub>2</sub> BTPhen)(NO <sub>3</sub> ) <sub>3</sub> | -13972.863       | 199.876           | 200.468           | 56.460 | 144.009           |
| Am(Cl <sub>2</sub> BTPhen)(NO <sub>3</sub> ) <sub>3</sub> | -34977.941       | 199.833           | 200.426           | 56.709 | 143.717           |
| Eu(Br <sub>2</sub> BTPhen)(NO <sub>3</sub> ) <sub>3</sub> | -18288.272       | 199.225           | 199.818           | 57.681 | 142.136           |
| Am(Br <sub>2</sub> BTPhen)(NO <sub>3</sub> ) <sub>3</sub> | -39293.350       | 199.180           | 199.773           | 57.980 | 141.793           |
| Eu(I <sub>2</sub> BTPhen)(NO <sub>3</sub> ) <sub>3</sub>  | -27409.499       | 200.944           | 201.536           | 57.501 | 144.036           |
| Am(I <sub>2</sub> BTPhen)(NO <sub>3</sub> ) <sub>3</sub>  | -48414.577       | 200.886           | 201.479           | 57.767 | 143.712           |
| H <sub>2</sub> BTPhen                                     | -1130.017        | 169.820           | 170.413           | 32.586 | 137.826           |
| BrHBTPhen                                                 | -3749.393        | 164.493           | 165.086           | 34.970 | 130.115           |
| F <sub>2</sub> BTPhen                                     | -1328.725        | 160.977           | 161.569           | 35.026 | 126.543           |
| Cl <sub>2</sub> BTPhen                                    | -2053.359        | 159.650           | 160.242           | 36.086 | 124.156           |
| Br <sub>2</sub> BTPhen                                    | -6368.768        | 158.971           | 159.564           | 37.410 | 122.153           |
| I <sub>2</sub> BTPhen                                     | -15489.994       | 160.679           | 161.271           | 37.243 | 124.028           |
| H <sub>2</sub> O                                          | -76.481          | 14.654            | 15.247            | 11.475 | 3.772             |
| NO <sub>3</sub> <sup>-</sup>                              | -280.663         | 10.647            | 11.240            | 12.842 | -1.603            |

**Table S2** Complex formation energy  $\Delta G(M)(X)$  and its difference  $\Delta\Delta G(X)$ 

| Ligand | $\Delta G(M)(X) / \text{kJ mol}^{-1}$ |        | $\Delta\Delta G(X)$<br>/ $\text{kJ mol}^{-1}$ |
|--------|---------------------------------------|--------|-----------------------------------------------|
|        | M= Eu                                 | M = Am |                                               |
| X = H  | -30.84                                | -39.12 | -8.28                                         |
| X = F  | -20.55                                | -31.08 | -10.53                                        |
| X = Cl | -22.01                                | -31.89 | -9.88                                         |
| X = Br | -22.01                                | -31.84 | -9.83                                         |
| X = I  | -24.10                                | -33.68 | -9.58                                         |

**Table S3** Electron density at bond critical point  $\rho_{\text{BCP}}$  of  $[\text{M}(\text{X}_2\text{BTPhen})(\text{NO}_3)_3]$ 

| Complex | $\rho_{\text{BCP}}$ |        |
|---------|---------------------|--------|
|         | Eu                  | Am     |
| X = H   | 0.0389              | 0.0442 |
| X = F   | 0.0384              | 0.0441 |
| X = Cl  | 0.0389              | 0.0445 |
| X = Br  | 0.0390              | 0.0446 |
| X = I   | 0.0390              | 0.0444 |

**Table S4** Coordinates of the optimized structures

36

Coordinates from ORCA-job (Br2BTPhen)\_num\_water\_BP\_ORCA4

|    |                   |                  |                   |
|----|-------------------|------------------|-------------------|
| N  | 8.92368738926556  | 4.54726994893091 | 3.18482080361022  |
| N  | 9.03814350125903  | 2.04654816650362 | 7.11141406281773  |
| N  | 10.71607212834653 | 2.67700178144475 | 2.26973897807779  |
| N  | 8.01112973377108  | 4.19543946339495 | 5.74255890872676  |
| N  | 9.54942309342966  | 1.00057994219146 | 7.76672834689396  |
| N  | 11.59306331341334 | 1.76493854312355 | 1.84081370831586  |
| N  | 7.70229892739656  | 2.65191258171566 | 9.01712653745249  |
| N  | 10.86900127171783 | 3.87446884740702 | 0.19056935408529  |
| C  | 6.59963297793693  | 7.46937204185668 | 3.48057918923499  |
| C  | 6.13414608506936  | 7.28900952937600 | 4.77420361864298  |
| C  | 6.15674771196971  | 5.95047720571679 | 6.91583402744417  |
| C  | 8.21870828028560  | 1.60707433456857 | 9.66378922546260  |
| C  | 9.15746601127026  | 0.76827403583521 | 9.02981594280002  |
| C  | 7.58791446979663  | 4.00361568501429 | 6.99549684491061  |
| C  | 8.99275091241823  | 5.77217580312483 | 1.09961661345312  |
| C  | 10.38186897253412 | 3.69370120752526 | 1.44202408281558  |
| C  | 8.07370363817398  | 6.69213969220893 | 1.58265230986612  |
| C  | 12.11204195525007 | 1.88831896685660 | 0.60868886313458  |
| C  | 8.14021156378411  | 2.83356146794808 | 7.74778986036120  |
| C  | 9.39456253388757  | 4.70045122871787 | 1.94356770969373  |
| C  | 6.59251537303228  | 6.18130579117794 | 5.58281389734865  |
| C  | 11.74435782354391 | 2.96093284515385 | -0.22860648823055 |
| C  | 7.55720335763261  | 6.55441900368854 | 2.89958996566984  |
| C  | 6.64987385480391  | 4.86618601991662 | 7.62675410861413  |
| C  | 7.54248666193031  | 5.24614989957321 | 5.03926848448137  |
| C  | 8.03326425412811  | 5.43603153428524 | 3.67011417740014  |
| H  | 9.40572755893769  | 5.85983645365816 | 0.08621839638667  |
| H  | 6.33124914098866  | 4.66688729937147 | 8.65822225250322  |
| H  | 7.73923423681089  | 7.52842760951347 | 0.95296023440991  |
| H  | 5.43192587405593  | 6.63563150782618 | 7.37738679965107  |
| H  | 12.83044052818360 | 1.11559897071109 | 0.29139582160713  |
| Br | 4.87444111205761  | 8.49749986391866 | 5.53002914717783  |
| Br | 5.99156048224049  | 8.93078462412333 | 2.42571206401120  |

|   |                   |                   |                   |
|---|-------------------|-------------------|-------------------|
| H | 9.60183091491229  | -0.10282118648790 | 9.53688610986101  |
| H | 12.16680586016792 | 3.07028900130837  | -1.24270989195310 |
| H | 7.89050249559757  | 1.42140528880072  | 10.70144893326166 |

36

Coordinates from ORCA-job (BrHBTPhen)\_V3\_num\_water\_BP\_ORCA4

|   |                   |                  |                   |
|---|-------------------|------------------|-------------------|
| N | 8.93542740737865  | 4.57872213615781 | 3.18688533144807  |
| N | 9.00425655706829  | 2.04885208608257 | 7.14231742883642  |
| N | 10.78855181808869 | 2.76656839785125 | 2.28051978975502  |
| N | 8.01108529468315  | 4.20014243094906 | 5.75704762443240  |
| N | 9.50177071592235  | 1.00089966971001 | 7.80494357289949  |
| N | 11.67079115036584 | 1.86228689961107 | 1.84554555345819  |
| N | 7.65334907516881  | 2.66659955807616 | 9.03285569600597  |
| N | 10.82847558357257 | 3.89986354708842 | 0.16061462600085  |
| C | 6.58804413356541  | 7.46845972090293 | 3.51026583775956  |
| C | 6.12135919460567  | 7.28391960809614 | 4.79186044194139  |
| C | 6.12896254902937  | 5.95813400274394 | 6.90827017139666  |
| C | 8.15532464397216  | 1.61901676062332 | 9.68642244772871  |
| C | 9.09495222340108  | 0.77272739817067 | 9.06386667155672  |
| C | 7.56589040970935  | 4.01428747146944 | 7.00509002143147  |
| C | 8.98377065150133  | 5.81181633849271 | 1.10274810474626  |
| C | 10.39411126572622 | 3.74610605159303 | 1.43489689467907  |
| C | 8.06052579899325  | 6.72400377980196 | 1.59360054968703  |
| C | 12.13461459911752 | 1.95675627192292 | 0.58933077227053  |
| C | 8.10479794569823  | 2.84412783610804 | 7.76713863046410  |
| C | 9.39867350020517  | 4.74210869120126 | 1.94391667175253  |
| C | 6.58775723605578  | 6.17929783352679 | 5.58116250982299  |
| C | 11.70855786606034 | 2.99367996369841 | -0.26508291333965 |
| C | 7.55076657639260  | 6.57530101689659 | 2.91012675444458  |
| C | 6.61539511993098  | 4.87529037741585 | 7.62650928291579  |
| C | 7.54509712363941  | 5.25073370675639 | 5.04884735429042  |
| C | 8.03620276396762  | 5.45574289469253 | 3.68045589210846  |
| H | 9.39507087755967  | 5.90075117158487 | 0.08873994834591  |
| H | 6.28737899429835  | 4.67001070775891 | 8.65406246935880  |
| H | 7.71849724273178  | 7.56384807894936 | 0.97154071749299  |
| H | 5.39396811472412  | 6.64648223338446 | 7.35268422976770  |



|    |                   |                   |                   |
|----|-------------------|-------------------|-------------------|
| H  | 12.85853525624004 | 1.19125190861607  | 0.26752301035847  |
| H  | 5.38731278249048  | 7.97678824261385  | 5.22826186872465  |
| Br | 5.92828407809499  | 8.95736142633987  | 2.50922414805351  |
| H  | 9.52863723738684  | -0.10065961534840 | 9.57637380024874  |
| H  | 12.08912904648666 | 3.08151338851964  | -1.29766460472096 |
| H  | 7.81409416616723  | 1.43773900794209  | 10.72062569387718 |

36

Coordinates from ORCA-job (BTPhen)\_V5\_num\_water\_BP\_ORCA4

|   |                   |                  |                   |
|---|-------------------|------------------|-------------------|
| N | 8.93873344337812  | 4.56456347164588 | 3.17607822004555  |
| N | 9.01410736341867  | 2.07125778281590 | 7.16657196679366  |
| N | 10.78009361755813 | 2.75519257377971 | 2.24316367812102  |
| N | 8.01338034885264  | 4.20674606569015 | 5.76092134537567  |
| N | 9.50817942516890  | 1.02635391634013 | 7.83629943768857  |
| N | 11.65841468013044 | 1.85310706836552 | 1.79671169325888  |
| N | 7.64595389407966  | 2.69081711781826 | 9.04398959375464  |
| N | 10.80571608114849 | 3.89981281149087 | 0.12909374591847  |
| C | 6.59895514166292  | 7.47478592938549 | 3.48686563610151  |
| C | 6.13631041360687  | 7.29494747794340 | 4.77026468771791  |
| C | 6.13929066916108  | 5.97894260586243 | 6.90063262828770  |
| C | 8.14520288553800  | 1.64650970857244 | 9.70480165646811  |
| C | 9.09102711720862  | 0.80003265704966 | 9.09233048274550  |
| C | 7.56892238387218  | 4.03145178416360 | 7.01062335543919  |
| C | 8.96906731935365  | 5.80831152561732 | 1.09025217396706  |
| C | 10.37948248523649 | 3.74106573735334 | 1.40621133558829  |
| C | 8.05012040942013  | 6.72033850324257 | 1.59051998413576  |
| C | 12.11403795133584 | 1.95381434369476 | 0.53773717139444  |
| C | 8.10612546106616  | 2.86575296081187 | 7.78085796557819  |
| C | 9.38942406773158  | 4.73523927877003 | 1.92795422880032  |
| C | 6.59553788850811  | 6.19277807774642 | 5.57215626301203  |
| C | 11.68205801192252 | 2.99546865257040 | -0.30752331643030 |
| C | 7.55307963085372  | 6.56452991167157 | 2.91245676774856  |
| C | 6.62177439564573  | 4.89917165903679 | 7.62705929478392  |
| C | 7.55068787740822  | 5.25472024799368 | 5.04399135079414  |
| C | 8.04296505714299  | 5.44565787150840 | 3.67346249413769  |
| H | 9.37502676680220  | 5.89543563316365 | 0.07377336306724  |

|   |                   |                   |                   |
|---|-------------------|-------------------|-------------------|
| H | 6.29375920191740  | 4.70172340444179  | 8.65613698173134  |
| H | 7.70161121267772  | 7.56373673227571  | 0.97457880004881  |
| H | 5.40712651602949  | 6.67252422186009  | 7.34228929008805  |
| H | 12.83554394485326 | 1.19008752523614  | 0.20645165188565  |
| H | 5.40548477611783  | 7.99383895100708  | 5.20558933961268  |
| H | 6.24497665066272  | 8.32094668243304  | 2.87748935379721  |
| H | 9.52148368112341  | -0.07141716964968 | 9.61080716429421  |
| H | 12.05540233067177 | 3.08832827550835  | -1.34242910504581 |
| H | 7.79693089873434  | 1.46832100278322  | 10.73714231929414 |

36

Coordinates from ORCA-job (Cl2BTPhen)\_num\_water\_BP\_ORCA4

|   |                   |                  |                   |
|---|-------------------|------------------|-------------------|
| N | 8.93786684463014  | 4.56971323523529 | 3.18932473906926  |
| N | 8.99145766412181  | 2.03505190311981 | 7.11252069461555  |
| N | 10.79335662508954 | 2.75405824978718 | 2.29198050675425  |
| N | 8.00511595772305  | 4.20489268897459 | 5.74815239026515  |
| N | 9.49369345310840  | 0.98610420973617 | 7.76984332782578  |
| N | 11.67700918520645 | 1.84949516098331 | 1.86122943007974  |
| N | 7.67402880452772  | 2.66532523585880 | 9.02263819800082  |
| N | 10.83804700651305 | 3.88266203067995 | 0.16937250740902  |
| C | 6.59831734846871  | 7.47567179643905 | 3.48131032562634  |
| C | 6.12781163397085  | 7.29195222529116 | 4.77284369197818  |
| C | 6.13260279165101  | 5.95623877861183 | 6.90672657375604  |
| C | 8.18016552736950  | 1.61617032564069 | 9.67093908415539  |
| C | 9.10667163268887  | 0.76449562317321 | 9.03623295117783  |
| C | 7.56682641962037  | 4.01113663026419 | 6.99610988096870  |
| C | 8.99095926785376  | 5.79589408014111 | 1.10136641093206  |
| C | 10.40046411966244 | 3.73138726174173 | 1.44263810358744  |
| C | 8.06862485576190  | 6.71181740081730 | 1.58625583129056  |
| C | 12.14405400442342 | 1.94120560699874 | 0.60583013222649  |
| C | 8.10862441854323  | 2.83748222076014 | 7.75101200572755  |
| C | 9.40411808779987  | 4.72849624178013 | 1.94654162413765  |
| C | 6.58450471047734  | 6.18494604783950 | 5.57957605496037  |
| C | 11.71983350791789 | 2.97593479244913 | -0.25196499445490 |
| C | 7.55902716504309  | 6.56536464307459 | 2.90405667943436  |
| C | 6.62057401214820  | 4.87108120159617 | 7.62031006974959  |

|    |                   |                   |                   |
|----|-------------------|-------------------|-------------------|
| C  | 7.54149002848684  | 5.25574344458828  | 5.04143563257454  |
| C  | 8.03958050550058  | 5.45049332291512  | 3.67500081557062  |
| H  | 9.40350627996608  | 5.88096532027730  | 0.08754086055860  |
| H  | 6.29270138274669  | 4.66732801949175  | 8.64805960732118  |
| H  | 7.72847996673843  | 7.54957696277810  | 0.96177462217361  |
| H  | 5.40092460274562  | 6.64077049027368  | 7.35797238826944  |
| H  | 12.86909691336415 | 1.17517315780951  | 0.28791474545152  |
| Cl | 4.96847019416167  | 8.40477068607401  | 5.44811576597012  |
| Cl | 6.03286913115937  | 8.81997881353915  | 2.52659526588383  |
| H  | 9.54496935068338  | -0.10906488807482 | 9.54447357798275  |
| H  | 12.10333522704631 | 3.06180267378505  | -1.28361227484885 |
| H  | 7.85259737308027  | 1.43780240554909  | 10.70997677381941 |

36

Coordinates from ORCA-job (F2BTPhen)\_num\_water\_BP\_ORCA4

|   |                   |                  |                  |
|---|-------------------|------------------|------------------|
| N | 8.94729054680013  | 4.56642734605234 | 3.17722600753576 |
| N | 8.97898272596048  | 2.04446784286063 | 7.15679447593430 |
| N | 10.79423682080817 | 2.76282962871595 | 2.24583464359831 |
| N | 8.00548318908458  | 4.19821475797985 | 5.76221621315691 |
| N | 9.47367447499491  | 1.00035578905587 | 7.82728209903077 |
| N | 11.67636507779964 | 1.86403117721224 | 1.80027337109101 |
| N | 7.63982006857935  | 2.68820701299390 | 9.04717324106004 |
| N | 10.83208874996592 | 3.91947816206866 | 0.13828921400499 |
| C | 6.61015727854544  | 7.45666390837990 | 3.48754105242317 |
| C | 6.14008035799045  | 7.27218281142634 | 4.77017928392442 |
| C | 6.12132252856356  | 5.96735050954679 | 6.89840418639823 |
| C | 8.13868616544588  | 1.64381919284541 | 9.70859908671445 |
| C | 9.07201784322771  | 0.78739090489225 | 9.09057565220092 |
| C | 7.55481860046438  | 4.01892436366270 | 7.00897127592427 |
| C | 8.98405654985063  | 5.81706951152631 | 1.09725173206862 |
| C | 10.39860019233836 | 3.75191562653253 | 1.41117131241504 |
| C | 8.06112557293983  | 6.72763368755779 | 1.59162815779169 |
| C | 12.13949235842725 | 1.97232978134926 | 0.54477295064628 |
| C | 8.08821210037497  | 2.85138207275487 | 7.77891114166161 |
| C | 9.40382723063811  | 4.74169995642873 | 1.93198085808262 |
| C | 6.59041632339514  | 6.17543150104116 | 5.57469297381105 |

|   |                   |                   |                   |
|---|-------------------|-------------------|-------------------|
| C | 11.71232688198108 | 3.01827069325674  | -0.29777474300459 |
| C | 7.56504545616127  | 6.55746256251304  | 2.91089420865636  |
| C | 6.60410328052021  | 4.88558443444292  | 7.62099335463102  |
| C | 7.54968768563962  | 5.24387201555047  | 5.04326524376684  |
| C | 8.04915633295918  | 5.43954067547885  | 3.67623806440847  |
| H | 9.39373764348760  | 5.90924623123602  | 0.08289448520997  |
| H | 6.27068788809307  | 4.68688023770121  | 8.64793153844340  |
| H | 7.71354178800549  | 7.57082009572377  | 0.97849158542198  |
| H | 5.38717702752019  | 6.65807442778523  | 7.33625647207829  |
| H | 12.86355920168189 | 1.21062059665535  | 0.21447375291114  |
| F | 5.24347902641995  | 8.13169122723961  | 5.28505422364616  |
| F | 6.17137028002004  | 8.49533336008512  | 2.75558895093703  |
| H | 9.50430371912657  | -0.08270956708174 | 9.60977561212730  |
| H | 12.09216644984668 | 3.11764896316600  | -1.32958593388786 |
| H | 7.79972058234224  | 1.47330550136393  | 10.74532425518004 |

3

Coordinates from ORCA-job (H2O)\_num\_water\_BP\_ORCA4

|   |                   |                   |                   |
|---|-------------------|-------------------|-------------------|
| O | 15.58411088537149 | 19.06045545857322 | -2.20750491250578 |
| H | 16.31628113374366 | 19.23966578927341 | -2.82990249008114 |
| H | 14.84349998088484 | 18.89705775215337 | -2.82422359741308 |

36

Coordinates from ORCA-job (I2BTPPhen)\_num\_water\_BP\_ORCA4

|   |                   |                  |                  |
|---|-------------------|------------------|------------------|
| N | 8.95396516379251  | 4.54814712788926 | 3.18708651277959 |
| N | 9.00645392702413  | 2.02620249243963 | 7.14264045951561 |
| N | 10.80691523075256 | 2.73864556960789 | 2.26875006817091 |
| N | 8.02020344791197  | 4.18334723948931 | 5.75508815201022 |
| N | 9.50180124528932  | 0.97961557103539 | 7.80891377503934 |
| N | 11.69147369219578 | 1.83960587157924 | 1.82834328702073 |
| N | 7.66305000478291  | 2.65867144434899 | 9.03396952148970 |
| N | 10.84418576037550 | 3.88516377891467 | 0.15546243368024 |
| C | 6.60821178100993  | 7.46004453583924 | 3.48854973907341 |
| C | 6.14183890579699  | 7.27777391494656 | 4.77005737962845 |
| C | 6.15067200765655  | 5.94341885496270 | 6.88911264744624 |
| C | 8.16246066286691  | 1.61209784452763 | 9.69128039243035 |

|   |                   |                   |                   |
|---|-------------------|-------------------|-------------------|
| C | 9.09782423752854  | 0.75977501731654  | 9.07033573327331  |
| C | 7.57679086879552  | 3.99669558008112  | 7.00226057537132  |
| C | 8.99379535316198  | 5.78524590380636  | 1.10812656640328  |
| C | 10.41028812092516 | 3.72239910514006  | 1.42872022649784  |
| C | 8.07194047707821  | 6.69347581855627  | 1.60710432854684  |
| C | 12.15564187382176 | 1.94318259831948  | 0.57277106838881  |
| C | 8.11315157378509  | 2.82785562266308  | 7.76720564381730  |
| C | 9.41484793385888  | 4.71401413946742  | 1.94329636122586  |
| C | 6.60418823555012  | 6.16944051959410  | 5.56492342982981  |
| C | 11.72682410651134 | 2.98401023674878  | -0.27548269228888 |
| C | 7.56586336214668  | 6.54499683821515  | 2.92312308052810  |
| C | 6.62964605752515  | 4.86279872155493  | 7.61480974900935  |
| C | 7.56065163119094  | 5.23142496872158  | 5.04172503337856  |
| C | 8.05627337552865  | 5.42520053361434  | 3.68038368523835  |
| H | 9.39874397004135  | 5.88024194990168  | 0.09213841995011  |
| H | 6.29382548252200  | 4.66866841425604  | 8.64183189202755  |
| H | 7.71936952426175  | 7.53699269012563  | 0.99747478506940  |
| H | 5.41771247428992  | 6.63742758345119  | 7.32357996687790  |
| H | 12.88192930075988 | 1.18184289682473  | 0.24657397679260  |
| I | 4.77324758813132  | 8.59042496461107  | 5.57659322895002  |
| I | 5.94557999338155  | 9.04800089753926  | 2.35432075354952  |
| H | 9.53001369113728  | -0.11232890840585 | 9.58620838212627  |
| H | 12.10744938871401 | 3.07898632196462  | -1.30740749497257 |
| H | 7.82282154989787  | 1.43635834035192  | 10.72689793212452 |

4

Coordinates from ORCA-job (NO3)\_num\_water\_BP\_ORCA4

|   |                   |                  |                  |
|---|-------------------|------------------|------------------|
| O | 11.37923505351828 | 4.50595767425207 | 4.61114299117613 |
| O | 10.94283337126837 | 3.70994884533768 | 6.60726538981088 |
| O | 12.34593845769951 | 5.37938100591393 | 6.37501832894225 |
| N | 11.55613911751384 | 4.53161847449631 | 5.86466429007074 |

49

Coordinates from ORCA-job Am(Br2BTPhen)(NO3)3\_num\_water\_BP\_ORCA4

|    |                  |                  |                  |
|----|------------------|------------------|------------------|
| Am | 9.73324905557567 | 2.59064661390969 | 4.67148506765334 |
| N  | 8.90409833580310 | 4.57487857550395 | 3.18701658958687 |

|   |                   |                   |                   |
|---|-------------------|-------------------|-------------------|
| N | 8.96454585027337  | 2.04907779478825  | 7.06158654864913  |
| N | 10.75304713512829 | 2.76787459361907  | 2.32015060528011  |
| N | 8.01700298529296  | 4.24241632902004  | 5.74707645110022  |
| O | 7.38434410783200  | 1.56504977878480  | 4.73615007325489  |
| O | 8.38079141725012  | 1.54757196185788  | 2.80463567076883  |
| O | 11.86447957185331 | 1.33092062932688  | 5.15259054350390  |
| O | 10.12709498754207 | 0.10213946325561  | 4.68055242509142  |
| O | 11.56155676097416 | 4.36846039816160  | 4.50413151684040  |
| O | 10.96682431265716 | 3.80712311071834  | 6.51776084657203  |
| N | 9.49055989979869  | 0.98743547935508  | 7.66414312302692  |
| N | 11.62673698015769 | 1.84024139999373  | 1.94352868835194  |
| N | 7.69836831737191  | 2.64203976485415  | 8.99676262676754  |
| N | 10.86736170606207 | 3.87252622038210  | 0.20711905065125  |
| O | 12.58082413291764 | 5.27119925692768  | 6.22942187084503  |
| O | 12.04176384634727 | -0.85895917995455 | 5.16762366115074  |
| O | 6.39313897697834  | 0.63372680177043  | 3.00933626983037  |
| N | 11.37025466930940 | 0.15323343452949  | 5.00582326531759  |
| N | 11.73811278441509 | 4.51381555214668  | 5.76695382338561  |
| N | 7.34612116011410  | 1.22473329040676  | 3.50019833926282  |
| C | 6.57800280101927  | 7.49632331009035  | 3.47649241658930  |
| C | 6.11155812826604  | 7.31570419040014  | 4.77081031739603  |
| C | 6.13827527983320  | 5.97517703013636  | 6.91118462072274  |
| C | 8.21584776401804  | 1.57477055383497  | 9.60349623515093  |
| C | 9.13290223051898  | 0.73721356584600  | 8.92941465544817  |
| C | 7.57165671213754  | 4.03282636732370  | 6.99892559815158  |
| C | 8.97619265110170  | 5.79689184857146  | 1.10092338788482  |
| C | 10.38380732673923 | 3.74492258295423  | 1.45956506642747  |
| C | 8.05060342650377  | 6.71334576513592  | 1.57988444701307  |
| C | 12.13244156769178 | 1.91304777367565  | 0.70634436311084  |
| C | 8.10199916184643  | 2.85172624801936  | 7.72709069170354  |
| C | 9.38495853594559  | 4.73311055908722  | 1.94027710843810  |
| C | 6.57697039189119  | 6.21096786079212  | 5.58140121574557  |
| C | 11.75189255699866 | 2.95162858841998  | -0.17301493990159 |
| C | 7.53859951912671  | 6.58131531545597  | 2.89763152874628  |
| C | 6.62879444788696  | 4.88695639620579  | 7.61934253993073  |
| C | 7.53330524135769  | 5.29087593262157  | 5.03637132867446  |

|    |                   |                   |                   |
|----|-------------------|-------------------|-------------------|
| C  | 8.01313266831696  | 5.47356215042036  | 3.67503250590293  |
| H  | 9.39299050372630  | 5.88154731280370  | 0.08918542150964  |
| H  | 6.30153244262606  | 4.67525511377927  | 8.64532408801107  |
| H  | 7.71178039583820  | 7.54354181737577  | 0.94522293263332  |
| H  | 5.40886544889234  | 6.65467470757628  | 7.37287723982334  |
| H  | 12.85028106718706 | 1.13008669204982  | 0.41786016899541  |
| Br | 4.84982214952545  | 8.51075979054888  | 5.52261683396830  |
| Br | 5.96950957970254  | 8.94555662033353  | 2.42058696777362  |
| H  | 9.58540874525885  | -0.14531329194699 | 9.40651063905251  |
| H  | 12.17366270755640 | 3.02283265940571  | -1.18968235136873 |
| H  | 7.90977555483263  | 1.36697426972523  | 10.64251291557564 |

49

Coordinates from ORCA-job Am(BrHBTPhen)(NO3)3\_num\_water\_BP\_ORCA4

|    |                   |                   |                  |
|----|-------------------|-------------------|------------------|
| Am | 9.71753232405926  | 2.59431343797666  | 4.66980907410130 |
| N  | 8.89333347241766  | 4.58494046831977  | 3.18443079870471 |
| N  | 8.95247485250836  | 2.05812433970558  | 7.06869360705759 |
| N  | 10.73397278485205 | 2.78309986598465  | 2.31471592961777 |
| N  | 8.00874100661690  | 4.23871535002799  | 5.75272179975989 |
| O  | 7.36956882652507  | 1.56526415260431  | 4.73404208483727 |
| O  | 8.37230634304714  | 1.54310439059499  | 2.80543374173949 |
| O  | 11.85225583870898 | 1.33090464564393  | 5.15472133472891 |
| O  | 10.10913219668702 | 0.10246308595303  | 4.70037742215256 |
| O  | 11.56014934758346 | 4.35852272098332  | 4.49653083418145 |
| O  | 10.95340007283531 | 3.81607412301395  | 6.51197275395935 |
| N  | 9.48383761135415  | 1.00002864621716  | 7.67232049833078 |
| N  | 11.61052103827111 | 1.85711891224561  | 1.94105297490981 |
| N  | 7.69099762395240  | 2.65201003774041  | 9.00714946101575 |
| N  | 10.86174956037386 | 3.89561207297376  | 0.20694576465232 |
| O  | 12.56417200601397 | 5.28300194453636  | 6.21928434506209 |
| O  | 12.02317067098029 | -0.85908244392337 | 5.18786346631297 |
| O  | 6.37866040969362  | 0.64058375058488  | 3.00337088518808 |
| N  | 11.35367362655857 | 0.15364786169059  | 5.02001742904527 |
| N  | 11.72731700377934 | 4.51769283249450  | 5.75901677771524 |
| N  | 7.33334812670751  | 1.22572307188461  | 3.49787098973048 |
| C  | 6.56735966540331  | 7.49389433209459  | 3.50624685323811 |

|    |                   |                   |                   |
|----|-------------------|-------------------|-------------------|
| C  | 6.10696575672308  | 7.31044889760339  | 4.79107642209480  |
| C  | 6.12809391618299  | 5.98727650345498  | 6.91310081575474  |
| C  | 8.21327021778541  | 1.58733256940953  | 9.61416902577925  |
| C  | 9.13149974122448  | 0.75150905046313  | 8.93965692616058  |
| C  | 7.55898445139901  | 4.04003245172084  | 7.00584011118133  |
| C  | 8.96256055733661  | 5.82002249809777  | 1.10383381278876  |
| C  | 10.37139115170356 | 3.76425645039695  | 1.45606256061215  |
| C  | 8.03581177198947  | 6.73371361457557  | 1.58880807323793  |
| C  | 12.12439711592967 | 1.93457325068515  | 0.70725621957361  |
| C  | 8.09005174064753  | 2.86109780033216  | 7.73559374290486  |
| C  | 9.37174420336079  | 4.75188018081689  | 1.93824069101422  |
| C  | 6.57523978007180  | 6.20936130323318  | 5.58337951881719  |
| C  | 11.74815530326942 | 2.97542286339456  | -0.17110392905314 |
| C  | 7.52663901796406  | 6.59308086102993  | 2.90498070020904  |
| C  | 6.61604398845099  | 4.89957374193142  | 7.62526211745837  |
| C  | 7.52776826763646  | 5.28758157570713  | 5.04163016147571  |
| C  | 8.00207534354054  | 5.48017313826596  | 3.67958321146107  |
| H  | 9.37993195848834  | 5.90900602078145  | 0.09263408974588  |
| H  | 6.29199499168225  | 4.68735494165769  | 8.65233866554973  |
| H  | 7.69318710868495  | 7.56858476234549  | 0.96126845595681  |
| H  | 5.39893795354385  | 6.67434235998405  | 7.36690121617996  |
| H  | 12.84533155263351 | 1.15367979640502  | 0.42087686414560  |
| H  | 5.37557863394947  | 8.00281744698256  | 5.23165799188063  |
| Br | 5.91700591008436  | 8.97200734242982  | 2.50381597412278  |
| H  | 9.58887237181084  | -0.12790202599423 | 9.41784493563397  |
| H  | 12.17496102634880 | 3.04906413929635  | -1.18550142353528 |
| H  | 7.91067775862845  | 1.38038386564598  | 10.65443922280835 |

49

Coordinates from ORCA-job Am(BTPhen)(NO3)3\_V2\_num\_water\_BP\_ORCA4

|    |                   |                  |                  |
|----|-------------------|------------------|------------------|
| Am | 9.73078628011924  | 2.58114328318420 | 4.66920776448382 |
| N  | 8.90574972810328  | 4.55924380070767 | 3.17839742788556 |
| N  | 8.94274059622903  | 2.04050332964059 | 7.06701606277389 |
| N  | 10.76251755260889 | 2.78177837643165 | 2.31492738024684 |
| N  | 8.02776031770996  | 4.23397544298517 | 5.75720225235404 |
| O  | 7.36230776147674  | 1.59569922683494 | 4.68402198402908 |



|   |                   |                   |                   |
|---|-------------------|-------------------|-------------------|
| O | 8.42436613809379  | 1.49933336440008  | 2.78923758154821  |
| O | 11.87494079108585 | 1.32396649994600  | 5.11779604948110  |
| O | 10.11972991107336 | 0.09030100813720  | 4.72852888006604  |
| O | 11.53427147180649 | 4.39216041675063  | 4.53395761726271  |
| O | 10.98183208962246 | 3.75490254580943  | 6.53790050104438  |
| N | 9.46228984168318  | 0.97587807389275  | 7.67026181460037  |
| N | 11.64482389350999 | 1.86091983382151  | 1.94167584268603  |
| N | 7.70424698757738  | 2.65717927173021  | 9.01418199231209  |
| N | 10.85927795450053 | 3.87221430953017  | 0.19267273334833  |
| O | 12.56790632034665 | 5.25308541369423  | 6.27198394111694  |
| O | 12.04624486989273 | -0.86572167859959 | 5.17658691490224  |
| O | 6.40818404479571  | 0.64046872676105  | 2.94929176045435  |
| N | 11.37265675550834 | 0.14487423898073  | 5.01310568319391  |
| N | 11.72887675198827 | 4.49764462789819  | 5.79784906390660  |
| N | 7.35887765938098  | 1.22173686710463  | 3.45724479574661  |
| C | 6.57948432101679  | 7.47516152867941  | 3.48185231615619  |
| C | 6.12868587046463  | 7.30455184131065  | 4.77087765576774  |
| C | 6.15825836697951  | 5.99689991205609  | 6.91181451458828  |
| C | 8.21378672358968  | 1.58530489965832  | 9.61949580895964  |
| C | 9.11461501500882  | 0.73493383888948  | 8.94036516335714  |
| C | 7.57813234630779  | 4.04256341111984  | 7.01083584694874  |
| C | 8.95452550520761  | 5.79579372505700  | 1.09220045220432  |
| C | 10.38022312676149 | 3.74951872645202  | 1.44745975341652  |
| C | 8.02611884152022  | 6.70655578373636  | 1.58143495297921  |
| C | 12.14704925835041 | 1.93038901085116  | 0.70259945733361  |
| C | 8.09791361068195  | 2.85810784847063  | 7.73973568041305  |
| C | 9.37474313208238  | 4.73031678707263  | 1.92852800274582  |
| C | 6.59759128910119  | 6.21053423120310  | 5.57874599782332  |
| C | 11.75275338833434 | 2.95795981134905  | -0.18294950428817 |
| C | 7.53184912807982  | 6.56424945304249  | 2.90482760170416  |
| C | 6.64240081718517  | 4.91020753011909  | 7.62945051322613  |
| C | 7.54687990738258  | 5.28033569762779  | 5.03988119396209  |
| C | 8.01740045932385  | 5.45675214178284  | 3.67509403533942  |
| H | 9.36726507959335  | 5.88058602136243  | 0.07859539538269  |
| H | 6.31958962103298  | 4.70425531311684  | 8.65817490216413  |
| H | 7.67122629514539  | 7.53894501361048  | 0.95533204931276  |

|   |                   |                   |                   |
|---|-------------------|-------------------|-------------------|
| H | 5.43339989113915  | 6.68921958306540  | 7.36512545909501  |
| H | 12.87267467205990 | 1.15323044412711  | 0.41783574047480  |
| H | 5.39847640790940  | 8.00190595548496  | 5.20813649398863  |
| H | 6.21560705942337  | 8.31228300107084  | 2.86767598130691  |
| H | 9.56210352252629  | -0.15039291100103 | 9.41702880993890  |
| H | 12.17046970307396 | 3.02572782947885  | -1.20159837952166 |
| H | 7.91455492360510  | 1.38442359156473  | 10.66194806177748 |

49

Coordinates from ORCA-job Am(Cl2BTPPhen)(NO3)3\_num\_water\_BP\_ORCA4

|    |                   |                   |                  |
|----|-------------------|-------------------|------------------|
| Am | 9.72869671329167  | 2.59242293768973  | 4.66967742777298 |
| N  | 8.90226705323408  | 4.57581569937684  | 3.18434285234560 |
| N  | 8.95894246101341  | 2.05428526371825  | 7.06382955305957 |
| N  | 10.74991388833550 | 2.77385425212028  | 2.31734676752906 |
| N  | 8.01317808893790  | 4.24277806196853  | 5.74846971438636 |
| O  | 7.38025985937707  | 1.56656894836908  | 4.73490149536227 |
| O  | 8.37602099505006  | 1.55252594720720  | 2.80300634967458 |
| O  | 11.86131807222005 | 1.33263442925997  | 5.14878129783566 |
| O  | 10.12352582593815 | 0.10370978653822  | 4.67775186502718 |
| O  | 11.55586365187183 | 4.37201066830698  | 4.50359202050204 |
| O  | 10.96195207159518 | 3.80826825227444  | 6.51676886568055 |
| N  | 9.48567545770802  | 0.99321321803897  | 7.66668514892114 |
| N  | 11.62582586180791 | 1.84769148875347  | 1.94213701369094 |
| N  | 7.69415885609013  | 2.64828526324590  | 8.99975905768313 |
| N  | 10.86457983986354 | 3.87806828528591  | 0.20409712713708 |
| O  | 12.57497590654015 | 5.27362389863011  | 6.22958806559420 |
| O  | 12.03907327074434 | -0.85718747767091 | 5.16157671524550 |
| O  | 6.38878506888568  | 0.63765869796568  | 3.00690202687772 |
| N  | 11.36700731034390 | 0.15490095724151  | 5.00146117322921 |
| N  | 11.73259484518943 | 4.51622587591184  | 5.76651804735213 |
| N  | 7.34173611782588  | 1.22823657597385  | 3.49836927081397 |
| C  | 6.58062182246429  | 7.49436930983070  | 3.47679914465504 |
| C  | 6.11241658983376  | 7.31275205380215  | 4.77072034264067 |
| C  | 6.13512650598171  | 5.98365256515090  | 6.91034348188974 |
| C  | 8.21234442810315  | 1.58151201642321  | 9.60675105584673 |
| C  | 9.12912312732454  | 0.74374027720541  | 8.93256005178642 |

|    |                   |                   |                   |
|----|-------------------|-------------------|-------------------|
| C  | 7.56653581017333  | 4.03799315290427  | 7.00081858983469  |
| C  | 8.97083920082341  | 5.80351889127143  | 1.09934611455608  |
| C  | 10.38052375188927 | 3.75044813680525  | 1.45624437070158  |
| C  | 8.04504107540705  | 6.71951069577899  | 1.58007288677966  |
| C  | 12.13287526410998 | 1.92119769441012  | 0.70543537810474  |
| C  | 8.09670740698331  | 2.85721644370717  | 7.72965454181312  |
| C  | 9.38099271142616  | 4.73807560603178  | 1.93718165098008  |
| C  | 6.57691045650153  | 6.21046294605304  | 5.58094167081622  |
| C  | 11.75080030024014 | 2.95834121474484  | -0.17490702270096 |
| C  | 7.53901162925373  | 6.58058315314234  | 2.89849942921718  |
| C  | 6.62535123049161  | 4.89591170129696  | 7.62043217229731  |
| C  | 7.53201054619516  | 5.29055543071391  | 5.03609907375586  |
| C  | 8.01214410387673  | 5.47309642281318  | 3.67496354675338  |
| H  | 9.38684717528760  | 5.88857404078599  | 0.08728060139609  |
| H  | 6.29895869958666  | 4.68591343378582  | 8.64707627391010  |
| H  | 7.70076323168247  | 7.55112447682843  | 0.95031884409785  |
| H  | 5.40810210820268  | 6.66827025120580  | 7.36822612518382  |
| H  | 12.85315993234545 | 1.14006091120630  | 0.41810432044242  |
| Cl | 4.95141800421647  | 8.41435366015216  | 5.44251164775537  |
| Cl | 6.01724125822239  | 8.83003948565115  | 2.52218545727457  |
| H  | 9.58227554783595  | -0.13815845259869 | 9.41020530681247  |
| H  | 12.17296267231718 | 3.02940902306141  | -1.19142258448683 |
| H  | 7.90739019336040  | 1.37431742763018  | 10.64623067216581 |

49

Coordinates from ORCA-job Am(F2BTPhen)(NO3)3\_num\_water\_BP\_ORCA4

|    |                   |                  |                  |
|----|-------------------|------------------|------------------|
| Am | 9.72283322831809  | 2.60159562825173 | 4.66877380830881 |
| N  | 8.90129386416146  | 4.58249582323986 | 3.17741781089131 |
| N  | 8.94550589376322  | 2.06834079990025 | 7.06990545073104 |
| N  | 10.74221627463187 | 2.79114705047488 | 2.30796847732322 |
| N  | 8.00838231481705  | 4.24782549004640 | 5.75428480165613 |
| O  | 7.37375691990341  | 1.57696052900673 | 4.73333905106128 |
| O  | 8.37038639212936  | 1.56228090493440 | 2.80197086563071 |
| O  | 11.85498017570403 | 1.34151627108368 | 5.14693791249343 |
| O  | 10.11651524710977 | 0.11292202970688 | 4.67770123776568 |
| O  | 11.54893658675226 | 4.38198111123852 | 4.50331939050208 |

|   |                   |                   |                   |
|---|-------------------|-------------------|-------------------|
| O | 10.95599495251040 | 3.81637701712691  | 6.51622334807030  |
| N | 9.47074268786271  | 1.00721773323198  | 7.67353273433905  |
| N | 11.61883767922592 | 1.86610570738812  | 1.93245333330437  |
| N | 7.67894503089690  | 2.66284609214177  | 9.00563296407973  |
| N | 10.85691072465916 | 3.89603779320802  | 0.19409354559570  |
| O | 12.56909660062157 | 5.28176421877873  | 6.22967032946280  |
| O | 12.03208574905585 | -0.84838967705461 | 5.16081019573246  |
| O | 6.38308196448520  | 0.64749549495816  | 3.00514602910170  |
| N | 11.36026930413972 | 0.16375864265802  | 5.00063041574247  |
| N | 11.72637678957161 | 4.52488607731224  | 5.76627710696018  |
| N | 7.33583173107979  | 1.23819782519041  | 3.49692783799192  |
| C | 6.58464984981157  | 7.48390792470676  | 3.48085584241727  |
| C | 6.12372162007901  | 7.30734086488826  | 4.76988622537490  |
| C | 6.12518057296154  | 6.00374497795832  | 6.90641595351269  |
| C | 8.19614903800275  | 1.59553128708691  | 9.61274000986488  |
| C | 9.11304953433525  | 0.75758827416046  | 8.93925037035863  |
| C | 7.55506801916436  | 4.05230256543285  | 7.00558841804464  |
| C | 8.95412169497831  | 5.82164453202747  | 1.09408272285197  |
| C | 10.37246813271406 | 3.76804847099988  | 1.44601724815961  |
| C | 8.02702130753603  | 6.73544480289865  | 1.57867194372573  |
| C | 12.12646972403327 | 1.93997323585227  | 0.69579375371233  |
| C | 8.08267189350432  | 2.87186581287211  | 7.73593762806313  |
| C | 9.37205954194227  | 4.75349092150652  | 1.92850297317971  |
| C | 6.57962726350212  | 6.21513608905875  | 5.57921484277164  |
| C | 11.74397207429386 | 2.97677026106050  | -0.18453034059886 |
| C | 7.53508936148821  | 6.58107861248346  | 2.90032216662823  |
| C | 6.61164175297720  | 4.91542184007269  | 7.61946690348966  |
| C | 7.53324315173238  | 5.29282026678308  | 5.03612751790452  |
| C | 8.01169223102756  | 5.47422629644113  | 3.67515582053552  |
| H | 9.36769244246358  | 5.90828822901677  | 0.08104288685269  |
| H | 6.28332951045534  | 4.70738010426604  | 8.64597356798753  |
| H | 7.67498408101084  | 7.56871992032136  | 0.95514407214461  |
| H | 5.39476632641888  | 6.69020110031223  | 7.35598602241038  |
| H | 12.84739188239824 | 1.15931225663862  | 0.40877182985138  |
| F | 5.23390261516945  | 8.16551744877799  | 5.28393911187816  |
| F | 6.13971487028747  | 8.51157932626526  | 2.74673911622875  |

|   |                   |                   |                   |
|---|-------------------|-------------------|-------------------|
| H | 9.56535427765691  | -0.12465419771385 | 9.41705048359735  |
| H | 12.16666635578939 | 3.04821041765033  | -1.20082632033305 |
| H | 7.89016676286648  | 1.38817879535212  | 10.65189758264167 |

49

Coordinates from ORCA-job Am(I2BTPhen)(NO3)3\_V2\_num\_water\_BP\_ORCA4

|    |                   |                   |                  |
|----|-------------------|-------------------|------------------|
| Am | 9.73426881761684  | 2.58140018333376  | 4.67043099238060 |
| N  | 8.91121727948811  | 4.56134240788222  | 3.18396546704934 |
| N  | 8.96503841021765  | 2.04382228654969  | 7.07091373543750 |
| N  | 10.75584907863225 | 2.76392636245757  | 2.31275077794363 |
| N  | 8.02372321262412  | 4.22867211862436  | 5.75074341601934 |
| O  | 7.39060900784494  | 1.54950137205981  | 4.74300450362836 |
| O  | 8.38107096428281  | 1.53351783760619  | 2.80850078187206 |
| O  | 11.87114573035410 | 1.32812481995990  | 5.14955557876366 |
| O  | 10.13667622571508 | 0.09362852788437  | 4.67983382669318 |
| O  | 11.56371082999128 | 4.36191378256000  | 4.49792546932774 |
| O  | 10.97076923003149 | 3.80167029076810  | 6.51251444043762 |
| N  | 9.48852147688888  | 0.98294476210646  | 7.67675078528748 |
| N  | 11.63505327221090 | 1.84133410439907  | 1.93661992677186 |
| N  | 7.69393016773480  | 2.64090309860669  | 9.00274077658294 |
| N  | 10.86465834726325 | 3.86946031681346  | 0.19869769096134 |
| O  | 12.58564334002803 | 5.26373186767726  | 6.22259946160575 |
| O  | 12.05643077280628 | -0.86121363717834 | 5.15980917943993 |
| O  | 6.39996385316165  | 0.60654996965001  | 3.02213940451786 |
| N  | 11.38043701968992 | 0.14876628170146  | 5.00238969372878 |
| N  | 11.74163518050292 | 4.50734389589442  | 5.76042790956291 |
| N  | 7.35055856198480  | 1.20567888510903  | 3.50785790992751 |
| C  | 6.58708142609809  | 7.48902913823698  | 3.48404149073558 |
| C  | 6.12475337098927  | 7.30977745786375  | 4.76911974756902 |
| C  | 6.14840545092493  | 5.97373602948369  | 6.89141897249286 |
| C  | 8.20784039553689  | 1.57314669069981  | 9.61177897241003 |
| C  | 9.12584313461553  | 0.73397215801716  | 8.94114757111933 |
| C  | 7.57372642134653  | 4.02736350283150  | 7.00213386271947 |
| C  | 8.97160003241297  | 5.79701108774389  | 1.10756791940297 |
| C  | 10.38358004094942 | 3.74029434066291  | 1.45193152402174 |
| C  | 8.04800133328517  | 6.70877388265607  | 1.60099804788778 |

|   |                   |                   |                   |
|---|-------------------|-------------------|-------------------|
| C | 12.14134309606536 | 1.91746598905323  | 0.69952353210341  |
| C | 8.10086965550042  | 2.84797654331115  | 7.73372006665382  |
| C | 9.38593845963422  | 4.72689678657533  | 1.93620601948125  |
| C | 6.59313689607227  | 6.20374324114192  | 5.56603393980432  |
| C | 11.75340000680190 | 2.95225614184834  | -0.18101913310467 |
| C | 7.54131458314761  | 6.56949585033587  | 2.91673296809782  |
| C | 6.62911750726140  | 4.88799909182993  | 7.61110025719190  |
| C | 7.54533881726190  | 5.27474130502529  | 5.03492642072310  |
| C | 8.02357218561976  | 5.45731314784242  | 3.67935588910031  |
| H | 9.38420232217809  | 5.88897710242984  | 0.09463812227860  |
| H | 6.29484285075839  | 4.68563846473117  | 8.63679595152350  |
| H | 7.70153098368735  | 7.54951523612630  | 0.98481104859630  |
| H | 5.41529152282186  | 6.66210316974768  | 7.33344692642144  |
| H | 12.86595599656872 | 1.14052464306814  | 0.41210803059219  |
| I | 4.76394475144521  | 8.61491991223748  | 5.57655108975049  |
| I | 5.92564104157058  | 9.06532224230317  | 2.35024034869468  |
| H | 9.57519475969143  | -0.14878062776868 | 9.42081623361050  |
| H | 12.17406574370419 | 3.02397538325410  | -1.19813919486988 |
| H | 7.89840243498041  | 1.36622555424608  | 10.65007664705282 |

49

Coordinates from ORCA-job Eu(Br2BTPPhen)(NO3)3\_num\_water\_BP\_ORCA4

|    |                   |                  |                  |
|----|-------------------|------------------|------------------|
| Eu | 9.72841889016871  | 2.58161717022575 | 4.66928353976632 |
| N  | 8.90189919571141  | 4.56524204347367 | 3.18412956710398 |
| N  | 8.94834746736590  | 2.02564594620686 | 7.06052643179242 |
| N  | 10.77341292280583 | 2.76874508757990 | 2.32335012368392 |
| N  | 8.01640233160657  | 4.23514393913932 | 5.74822745436961 |
| O  | 7.34751810138402  | 1.62135002262435 | 4.67724878759491 |
| O  | 8.40362146668785  | 1.51639916617431 | 2.77949733873721 |
| O  | 11.86069194501862 | 1.34672981284040 | 5.10195559310268 |
| O  | 10.10743027087375 | 0.11171386693867 | 4.72130830991294 |
| O  | 11.51122203674969 | 4.41542427786315 | 4.54149692597548 |
| O  | 10.96898986418974 | 3.77119829192155 | 6.54645165249327 |
| N  | 9.47678668208309  | 0.97224552412299 | 7.66954235408803 |
| N  | 11.64891275664970 | 1.84740127566116 | 1.94444229089827 |
| N  | 7.71928643794880  | 2.65217060373386 | 9.00744942405197 |

|    |                   |                   |                   |
|----|-------------------|-------------------|-------------------|
| N  | 10.85920480478365 | 3.85740335529173  | 0.20231069263225  |
| O  | 12.54461463712672 | 5.27563336736607  | 6.27722793975566  |
| O  | 12.03710617072924 | -0.84112848676680 | 5.15409258708681  |
| O  | 6.38465808302221  | 0.67294142498720  | 2.94626023522898  |
| N  | 11.36014057660888 | 0.16860792002021  | 4.99761672535377  |
| N  | 11.70618009867439 | 4.51569374268863  | 5.80307016604110  |
| N  | 7.34247026144133  | 1.24900357686643  | 3.45262543373820  |
| C  | 6.58070340201970  | 7.48874029535408  | 3.47640551161195  |
| C  | 6.11713286063676  | 7.31066689673571  | 4.77207988301224  |
| C  | 6.14766974559004  | 5.97337116551283  | 6.91457990240794  |
| C  | 8.23640489702661  | 1.58815538891959  | 9.61997220019739  |
| C  | 9.13933591793668  | 0.73748421267632  | 8.94382790743521  |
| C  | 7.57581481308154  | 4.02740569397208  | 7.00031449634501  |
| C  | 8.97539536005560  | 5.78642158692960  | 1.09933024847845  |
| C  | 10.38730402740981 | 3.73599672153693  | 1.45953955928981  |
| C  | 8.05052200289285  | 6.70266121433546  | 1.57881954370790  |
| C  | 12.14548066882260 | 1.91300717775966  | 0.70260549327454  |
| C  | 8.10495675266682  | 2.84515137981396  | 7.72972060322634  |
| C  | 9.38403821534206  | 4.72224666772891  | 1.93964992530394  |
| C  | 6.58260864866864  | 6.20616972548819  | 5.58283500477614  |
| C  | 11.74855057108305 | 2.94207970965949  | -0.18014576031213 |
| C  | 7.53876855034121  | 6.57159553470451  | 2.89695451244828  |
| C  | 6.63711655469577  | 4.88569702910933  | 7.62337435088498  |
| C  | 7.53525638519313  | 5.28228350143885  | 5.03769424814296  |
| C  | 8.01346248151865  | 5.46288138361571  | 3.67303989218492  |
| H  | 9.39173834217676  | 5.87199315131983  | 0.08751551442717  |
| H  | 6.31219414802770  | 4.67737772129330  | 8.65075739708567  |
| H  | 7.71290450612761  | 7.53365783795304  | 0.94447689799922  |
| H  | 5.42114638789259  | 6.65519943601636  | 7.37750324407142  |
| H  | 12.86709211852846 | 1.13368454791322  | 0.41399608267714  |
| Br | 4.86008991314943  | 8.50886458720260  | 5.52570329408305  |
| Br | 5.97266255881437  | 8.93735444583609  | 2.42017104384104  |
| H  | 9.59585138215187  | -0.14052259848319 | 9.42523828810474  |
| H  | 12.16053009779102 | 3.00974311967238  | -1.20100260317937 |
| H  | 7.94279968872857  | 1.39388353702577  | 10.66516474506630 |

## Coordinates from ORCA-job Eu(BrHBTPhen)(NO3)3\_num\_water\_BP\_ORCA4

|    |                   |                   |                  |
|----|-------------------|-------------------|------------------|
| Eu | 9.71938293598496  | 2.59145544855477  | 4.67294437664224 |
| N  | 8.89494523027137  | 4.57705732390642  | 3.18297191579029 |
| N  | 8.93803167246973  | 2.03640848500715  | 7.07101519072771 |
| N  | 10.76114797013791 | 2.78701669709360  | 2.31945593253760 |
| N  | 8.01405169069974  | 4.23542806634830  | 5.75634730364960 |
| O  | 7.34024949687094  | 1.62225433952223  | 4.67999748384734 |
| O  | 8.39846189696565  | 1.52194611210848  | 2.78306166516880 |
| O  | 11.85229120869881 | 1.35370667557340  | 5.09994657393476 |
| O  | 10.09479965168592 | 0.12022236639979  | 4.73358676667595 |
| O  | 11.50292976282839 | 4.42481740021245  | 4.54716293168028 |
| O  | 10.96895762959280 | 3.77282987776361  | 6.55168374750217 |
| N  | 9.46687227182469  | 0.98417790177197  | 7.68109148937553 |
| N  | 11.63517336664226 | 1.86473660976266  | 1.93930063089657 |
| N  | 7.70641110924349  | 2.66178176098449  | 9.01747043794675 |
| N  | 10.84850019150917 | 3.87743072333073  | 0.19901906940162 |
| O  | 12.54260644541609 | 5.27917311363786  | 6.28225603435064 |
| O  | 12.02475516950534 | -0.83416173579976 | 5.16144503305817 |
| O  | 6.38194830050564  | 0.67229005880407  | 2.94729884813822 |
| N  | 11.34882231030212 | 0.17610980689604  | 5.00349242490364 |
| N  | 11.70266732479695 | 4.52034978216649  | 5.80855854620440 |
| N  | 7.33755038842010  | 1.25090876509569  | 3.45527265053593 |
| C  | 6.56988424660825  | 7.48549956545536  | 3.50474428951036 |
| C  | 6.11197339273538  | 7.30471129451778  | 4.79077020221103 |
| C  | 6.13633510051647  | 5.98529237289818  | 6.91496733723289 |
| C  | 8.22426892725391  | 1.59831716787832  | 9.63025140558394 |
| C  | 9.12912284040651  | 0.74888316907209  | 8.95531191992766 |
| C  | 7.56550421075886  | 4.03680476283840  | 7.00821069238326 |
| C  | 8.96098283963321  | 5.80735480156398  | 1.10120105636326 |
| C  | 10.37620897454393 | 3.75525622729330  | 1.45585359435153 |
| C  | 8.03457808306852  | 6.72082982730248  | 1.58626998908376 |
| C  | 12.13179065338774 | 1.93065492444585  | 0.69741612047814 |
| C  | 8.09280421602921  | 2.85612763523291  | 7.73982012538166 |
| C  | 9.37268296552055  | 4.74091186200363  | 1.93817897822707 |
| C  | 6.58204233681861  | 6.20539627545109  | 5.58432815258743 |



|    |                   |                   |                   |
|----|-------------------|-------------------|-------------------|
| C  | 11.73696103470777 | 2.96138251355196  | -0.18415683296006 |
| C  | 7.52807289808155  | 6.58336990835549  | 2.90380314104254  |
| C  | 6.62361330815924  | 4.89852608951866  | 7.62832426689119  |
| C  | 7.53388872831919  | 5.28164559245301  | 5.04415353252413  |
| C  | 8.00603343500359  | 5.47138307985060  | 3.67869652982280  |
| H  | 9.37610243218103  | 5.89596644084179  | 0.08911191083652  |
| H  | 6.29875247727225  | 4.68837021667390  | 8.65551859916487  |
| H  | 7.69025514169677  | 7.55406578608816  | 0.95738146123148  |
| H  | 5.40727800818517  | 6.67279825301735  | 7.36844366786277  |
| H  | 12.85197547105989 | 1.15020671084570  | 0.40816901348386  |
| H  | 5.38055200852439  | 7.99724705682530  | 5.23094195974329  |
| Br | 5.91712656945213  | 8.96049018383819  | 2.49987222947925  |
| H  | 9.58659766280636  | -0.12849276922245 | 9.43696462992115  |
| H  | 12.14943857117162 | 3.02989943652498  | -1.20477741138672 |
| H  | 7.92946344172589  | 1.40359503574355  | 10.67508538605266 |

49

Coordinates from ORCA-job Eu(BTPhen)(NO3)3\_num\_water\_BP\_ORCA4

|    |                   |                   |                  |
|----|-------------------|-------------------|------------------|
| Eu | 9.72994666413055  | 2.58263940663582  | 4.66918578133846 |
| N  | 8.91275120141274  | 4.55807075702655  | 3.17924672045670 |
| N  | 8.94308709061945  | 2.02786502127431  | 7.07108144817845 |
| N  | 10.77498675907095 | 2.77699493808857  | 2.31303126983469 |
| N  | 8.02733659133827  | 4.22772497559488  | 5.75712050160495 |
| O  | 7.34952065437327  | 1.61840892519893  | 4.67037604232158 |
| O  | 8.41561746510367  | 1.50294312412945  | 2.77902469223057 |
| O  | 11.86285508861949 | 1.34113605132048  | 5.09675492829250 |
| O  | 10.10318205456537 | 0.10937805261767  | 4.73811894673679 |
| O  | 11.52267293106062 | 4.40927465089325  | 4.54914631313452 |
| O  | 10.97936689528470 | 3.75968785838583  | 6.55170589044741 |
| N  | 9.46685484086279  | 0.97246100298475  | 7.68028258945113 |
| N  | 11.65080647538496 | 1.85633920433342  | 1.93426071854780 |
| N  | 7.71140336810081  | 2.65516315591710  | 9.01720687850947 |
| N  | 10.86057330393351 | 3.86487849859920  | 0.19071077305796 |
| O  | 12.55700734689304 | 5.26311320315291  | 6.28792994703005 |
| O  | 12.03194123420210 | -0.84685489915891 | 5.16748316961993 |
| O  | 6.39360125407256  | 0.66492997318430  | 2.93802745062148 |

|   |                   |                   |                   |
|---|-------------------|-------------------|-------------------|
| N | 11.35752338509291 | 0.16415079314906  | 5.00611639426439  |
| N | 11.71745335367245 | 4.50520658020432  | 5.81093200151562  |
| N | 7.35047077796058  | 1.24090681212149  | 3.44750217024005  |
| C | 6.58359598206860  | 7.47019394613868  | 3.48212821695394  |
| C | 6.12969930102019  | 7.29736746979180  | 4.76972563183839  |
| C | 6.15534887577416  | 5.98588737380063  | 6.90917914294812  |
| C | 8.22346732911590  | 1.58798869846507  | 9.62857073906841  |
| C | 9.12564132509950  | 0.73603141780291  | 8.95342420047571  |
| C | 7.57792005148622  | 4.03327949723212  | 7.00867801867542  |
| C | 8.96332600154800  | 5.79340503225362  | 1.09430747316642  |
| C | 10.38752299412957 | 3.74432654289772  | 1.44800629195302  |
| C | 8.03488765197462  | 6.70381861724086  | 1.58359304043940  |
| C | 12.14855181815329 | 1.92170363406438  | 0.69273337423580  |
| C | 8.10035482402432  | 2.85000499458618  | 7.74032866345283  |
| C | 9.38278879158261  | 4.72705543772507  | 1.93121920410458  |
| C | 6.59732589974272  | 6.20264502369480  | 5.57742400920505  |
| C | 11.75128979794940 | 2.95021099508308  | -0.19027469771319 |
| C | 7.53793314922785  | 6.56083111809211  | 2.90590252939241  |
| C | 6.63951164549852  | 4.89961777767349  | 7.62703076178280  |
| C | 7.54902312740546  | 5.27343669122083  | 5.04067268784092  |
| C | 8.02364151425154  | 5.45244458315730  | 3.67522576647417  |
| H | 9.37592466549490  | 5.87984515376266  | 0.08081546546869  |
| H | 6.31398226193578  | 4.69344327604210  | 8.65483205222908  |
| H | 7.68137974633409  | 7.53678407908485  | 0.95738534798760  |
| H | 5.42868742978858  | 6.67655542300280  | 7.36224061009341  |
| H | 12.87068871389324 | 1.14254554278495  | 0.40495211420181  |
| H | 5.39826581533785  | 7.99389190647363  | 5.20627336829369  |
| H | 6.21989612590269  | 8.30746591619465  | 2.86806308703238  |
| H | 9.57833328746659  | -0.14433415902832 | 9.43415060148470  |
| H | 12.16428541551650 | 3.01824764769755  | -1.21078830168065 |
| H | 7.92593372252249  | 1.39249527741110  | 10.67250797316059 |

49

Coordinates from ORCA-job Eu(Cl2BTPhen)(NO3)3\_num\_water\_BP\_ORCA4

|    |                  |                  |                  |
|----|------------------|------------------|------------------|
| Eu | 9.72790438479775 | 2.58425018253865 | 4.66921210098885 |
| N  | 8.90224871737120 | 4.56742655821771 | 3.18226021413282 |

|   |                   |                   |                   |
|---|-------------------|-------------------|-------------------|
| N | 8.94414253364288  | 2.03204847832653  | 7.06347220717752  |
| N | 10.77036070515702 | 2.77534426307108  | 2.31937447858333  |
| N | 8.01615364540132  | 4.23752990979727  | 5.75082711721354  |
| O | 7.34642065917157  | 1.62318161174087  | 4.67772247838852  |
| O | 8.40177569913136  | 1.52059533203667  | 2.77939728936800  |
| O | 11.85968434425556 | 1.34883095343592  | 5.10192438487144  |
| O | 10.10619016255876 | 0.11464701484215  | 4.72128611022793  |
| O | 11.51135565450143 | 4.41847705453739  | 4.54154581635147  |
| O | 10.96760903039065 | 3.77462714449714  | 6.54604283127008  |
| N | 9.47138842569958  | 0.97799458601647  | 7.67227869273339  |
| N | 11.64566978833955 | 1.85407211053707  | 1.94013902637307  |
| N | 7.71215352395242  | 2.65661319948794  | 9.00951440421032  |
| N | 10.85611892159428 | 3.86421770480032  | 0.19814834159972  |
| O | 12.54076245116089 | 5.28182261322851  | 6.27822503653316  |
| O | 12.03545544996173 | -0.83912255296664 | 5.15411814052911  |
| O | 6.38203805204050  | 0.67905681295304  | 2.94526258329542  |
| N | 11.35893659379877 | 0.17083190195436  | 4.99762857246559  |
| N | 11.70431777191810 | 4.52007049488007  | 5.80332546935160  |
| N | 7.34062034567629  | 1.25324720836143  | 3.45244920917947  |
| C | 6.58366797651724  | 7.48746476284245  | 3.47676003098193  |
| C | 6.11781873642707  | 7.30792946730324  | 4.77217237005832  |
| C | 6.14515543831904  | 5.98210720507817  | 6.91356340301786  |
| C | 8.22793002853634  | 1.59157118603474  | 9.62144780636700  |
| C | 9.13204528455490  | 0.74167724002619  | 8.94575120270317  |
| C | 7.57270894088751  | 4.03376860030414  | 7.00268764247874  |
| C | 8.96813498901601  | 5.79206963464357  | 1.09691577611585  |
| C | 10.38406325541825 | 3.74256493520109  | 1.45531469349152  |
| C | 8.04317570767502  | 6.70784496864635  | 1.57847652285704  |
| C | 12.14260741687344 | 1.91990089964384  | 0.69847706165404  |
| C | 8.09993769817206  | 2.85111799527218  | 7.73263301667702  |
| C | 9.38053005723900  | 4.72775017419287  | 1.93656051653709  |
| C | 6.58384638816845  | 6.20628919172853  | 5.58252325606535  |
| C | 11.74587035082739 | 2.94927225092560  | -0.18414318336230 |
| C | 7.53983743221096  | 6.57133302687096  | 2.89827711840082  |
| C | 6.63448498574507  | 4.89493995839215  | 7.62429145800827  |
| C | 7.53654176376572  | 5.28343962699389  | 5.03829356972604  |

|    |                   |                   |                   |
|----|-------------------|-------------------|-------------------|
| C  | 8.01450387943778  | 5.46368166307918  | 3.67376189432790  |
| H  | 9.38203140875233  | 5.87743161331261  | 0.08405528070059  |
| H  | 6.30924649055194  | 4.68792201072449  | 8.65186896985464  |
| H  | 7.69770811527617  | 7.53867562522518  | 0.94821421736808  |
| H  | 5.41963301393528  | 6.66807063300488  | 7.37203255085967  |
| H  | 12.86411238290251 | 1.14043968083565  | 0.40995986170632  |
| Cl | 4.96186815735161  | 8.41261145359521  | 5.44578514773111  |
| Cl | 6.01783150136288  | 8.82022246662350  | 2.52078892038329  |
| H  | 9.58772001747756  | -0.13708758603973 | 9.42658310023808  |
| H  | 12.15827177170759 | 3.01759049471662  | -1.20481047115219 |
| H  | 7.93225595036919  | 1.39607123852851  | 10.66583876136042 |

49

Coordinates from ORCA-job Eu(F2BTPhen)(NO3)3\_num\_water\_BP\_ORCA4

|    |                   |                   |                  |
|----|-------------------|-------------------|------------------|
| Eu | 9.72481122937474  | 2.58997527759752  | 4.66864981951129 |
| N  | 8.90112233902986  | 4.57386074454065  | 3.17530387253772 |
| N  | 8.93111366524568  | 2.04862505019303  | 7.07048170488249 |
| N  | 10.76110577824132 | 2.79277313885665  | 2.30877881389918 |
| N  | 8.01206272573461  | 4.24330671451826  | 5.75724869728165 |
| O  | 7.34258958452782  | 1.63375930081189  | 4.67816884361267 |
| O  | 8.39614848280209  | 1.53008661951548  | 2.77913877076978 |
| O  | 11.85648239890784 | 1.35266951036678  | 5.09834121713335 |
| O  | 10.10053928604114 | 0.11965057572804  | 4.72434137265638 |
| O  | 11.50571116916369 | 4.42527587222091  | 4.53908740569535 |
| O  | 10.96261567725218 | 3.78168989815632  | 6.54368216574252 |
| N  | 9.45602845223731  | 0.99353690470666  | 7.67890718516455 |
| N  | 11.63775977224980 | 1.87312794872071  | 1.92973855112014 |
| N  | 7.69535648276925  | 2.67118712057431  | 9.01565222709529 |
| N  | 10.84973600695107 | 3.88440051552247  | 0.18831822710028 |
| O  | 12.53313537486324 | 5.29176142938466  | 6.27552956630198 |
| O  | 12.02977300117713 | -0.83540917378577 | 5.15454251066854 |
| O  | 6.37488154419169  | 0.69214027252948  | 2.94606378274927 |
| N  | 11.35408347583435 | 0.17495533277585  | 4.99758029219011 |
| N  | 11.69833768744507 | 4.52815760216529  | 5.80081496270810 |
| N  | 7.33492031667727  | 1.26427376196910  | 3.45270633297499 |
| C  | 6.58659009725244  | 7.47619210508520  | 3.48063820133641 |

|   |                   |                   |                   |
|---|-------------------|-------------------|-------------------|
| C | 6.12965671501293  | 7.30299361617535  | 4.77144373743367  |
| C | 6.13594346441188  | 6.00364637655597  | 6.91020278257771  |
| C | 8.20975461020171  | 1.60488992750068  | 9.62696054888478  |
| C | 9.11432833971866  | 0.75541363446278  | 8.95167834225760  |
| C | 7.56164885682792  | 4.04968062288193  | 7.00806973122840  |
| C | 8.94946572531311  | 5.80958844296242  | 1.09077178003741  |
| C | 10.37540688197463 | 3.76094436934359  | 1.44433638223585  |
| C | 8.02314648478852  | 6.72285735317731  | 1.57634599412731  |
| C | 12.13713886813532 | 1.94058893855580  | 0.68890073316927  |
| C | 8.08556253286506  | 2.86726243285925  | 7.73987844393978  |
| C | 9.37029268672253  | 4.74307319170193  | 1.92749208296323  |
| C | 6.58706120931928  | 6.21186291909000  | 5.58120288905584  |
| C | 11.74123642066392 | 2.97053752590691  | -0.19315491457529 |
| C | 7.53463960252140  | 6.57122426004238  | 2.89966298657728  |
| C | 6.62167619243661  | 4.91643358871835  | 7.62435925642588  |
| C | 7.53809676890242  | 5.28621589903927  | 5.03872636821932  |
| C | 8.01368513159638  | 5.46466113841599  | 3.67383242481073  |
| H | 9.36061509453936  | 5.89587601442733  | 0.07678560301947  |
| H | 6.29411094885438  | 4.71068542546354  | 8.65152352335636  |
| H | 7.66887549695436  | 7.55507242549457  | 0.95254108741876  |
| H | 5.40878515254223  | 6.69314947702495  | 7.36053902349188  |
| H | 12.85986012814329 | 1.16203696963271  | 0.40100487731429  |
| F | 5.24140824859750  | 8.16142278011685  | 5.28634140396223  |
| F | 6.14115492156039  | 8.50217697167462  | 2.74544997296746  |
| H | 9.56842972301757  | -0.12448445657676 | 9.43189790226987  |
| H | 12.15575813238833 | 3.04047988267718  | -1.21286868350036 |
| H | 7.91220311402071  | 1.40814675052163  | 10.67059619719925 |

49

Coordinates from ORCA-job Eu(I2BTPhen)(NO3)3\_num\_water\_BP\_ORCA4

|    |                   |                  |                  |
|----|-------------------|------------------|------------------|
| Eu | 9.73333100744674  | 2.57640038142776 | 4.66989620895775 |
| N  | 8.91288374122533  | 4.55285661116498 | 3.18244278671926 |
| N  | 8.94968816958797  | 2.02159569782063 | 7.06849674438807 |
| N  | 10.77816761829676 | 2.76627604300544 | 2.31649940611143 |
| N  | 8.02618595476676  | 4.22200126209575 | 5.75283185788198 |
| O  | 7.35273858388763  | 1.61259909634594 | 4.67870639440080 |

|   |                   |                   |                   |
|---|-------------------|-------------------|-------------------|
| O | 8.40826489393086  | 1.51002614845939  | 2.78040588764894  |
| O | 11.86578905510237 | 1.34073309574081  | 5.10295545301283  |
| O | 10.11265706970583 | 0.10586871235610  | 4.72311022161120  |
| O | 11.51781610450374 | 4.40937873477264  | 4.54202980927530  |
| O | 10.97440463027144 | 3.76560698429892  | 6.54677412408350  |
| N | 9.47597702965887  | 0.96814673730804  | 7.67903175250970  |
| N | 11.65382529721123 | 1.84590269121330  | 1.93618836105677  |
| N | 7.71561458908131  | 2.64899576535799  | 9.01332060373728  |
| N | 10.86223977872008 | 3.85703989851995  | 0.19527768581791  |
| O | 12.54652799598598 | 5.27379868566109  | 6.27856370802591  |
| O | 12.04218490821961 | -0.84712928697531 | 5.15637757791120  |
| O | 6.38847748754927  | 0.66860502304185  | 2.94613656812931  |
| N | 11.36531888913719 | 0.16262072767406  | 4.99932547318994  |
| N | 11.71056290416264 | 4.51128780791559  | 5.80373900128162  |
| N | 7.34712310846840  | 1.24277265866523  | 3.45344640799620  |
| C | 6.58782103350701  | 7.47732786186930  | 3.48309975596761  |
| C | 6.12998018518864  | 7.30187594553229  | 4.77016868081986  |
| C | 6.15965232184018  | 5.97185689046470  | 6.89569597054513  |
| C | 8.23110821615274  | 1.58461954443123  | 9.62680380234188  |
| C | 9.13552651287033  | 0.73371493568285  | 8.95270709700737  |
| C | 7.57996088866275  | 4.02209730757751  | 7.00401038197428  |
| C | 8.96997964686129  | 5.78452768301249  | 1.10534368581713  |
| C | 10.39132315532369 | 3.73397093505843  | 1.45273782057406  |
| C | 8.04442488684334  | 6.69406144526561  | 1.59780691439248  |
| C | 12.15008120392828 | 1.91294106713039  | 0.69419191048188  |
| C | 8.10490955956236  | 2.84135569246719  | 7.73656857090979  |
| C | 9.38812744313273  | 4.71688701756819  | 1.93643785044183  |
| C | 6.60035292522757  | 6.19810740904224  | 5.56800124446230  |
| C | 11.75224681910760 | 2.94249795925761  | -0.18775026149192 |
| C | 7.54045417743993  | 6.55700508129519  | 2.91515887170290  |
| C | 6.64076439168033  | 4.88760439148738  | 7.61611734345708  |
| C | 7.54991354383696  | 5.26636604141513  | 5.03720774421799  |
| C | 8.02582036094121  | 5.44636457515251  | 3.67780215452504  |
| H | 9.37820892064361  | 5.87960040428148  | 0.09101370044093  |
| H | 6.30734818220340  | 4.68812211267998  | 8.64256057560275  |
| H | 7.69431878300083  | 7.53121356865376  | 0.97834564275534  |

|   |                   |                   |                   |
|---|-------------------|-------------------|-------------------|
| H | 5.42980405893122  | 6.66286835891204  | 7.33953353987368  |
| H | 12.87198915415461 | 1.13417446204657  | 0.40478883421793  |
| I | 4.77165931817678  | 8.60497969283692  | 5.58031838517831  |
| I | 5.91976388838090  | 9.04589491597402  | 2.34622935399595  |
| H | 9.59058634987786  | -0.14449442607228 | 9.43514150459037  |
| H | 12.16409347940402 | 3.01119186028908  | -1.20862083665044 |
| H | 7.93484777619982  | 1.39031679081807  | 10.67125872810166 |

**Table S5** Calculation results of binding energy (hartree)

|                                                            | $E_{BE}$ | $E_{comp}$ | $E_{metal}$ | $E_{ligands}$ | $E_{BSSE}$ | $E'_{metal}$ | $E'_{ligands}$ |
|------------------------------------------------------------|----------|------------|-------------|---------------|------------|--------------|----------------|
| Eu(H <sub>2</sub> BTPPhen)(NO <sub>3</sub> ) <sub>3</sub>  | -0.892   | -13049.52  | -11077.11   | -1971.88      | -0.351     | -11076.72    | -1971.91       |
| Am(H <sub>2</sub> BTPPhen)(NO <sub>3</sub> ) <sub>3</sub>  | -0.800   | -34054.53  | -32082.21   | -1971.87      | -0.352     | -32081.83    | -1971.90       |
| Eu(BrHBTPPhen)(NO <sub>3</sub> ) <sub>3</sub>              | -0.886   | -15668.90  | -11077.11   | -4591.25      | -0.348     | -11076.73    | -4591.29       |
| Am(BrHBTPPhen)(NO <sub>3</sub> ) <sub>3</sub>              | -0.867   | -36673.98  | -32082.21   | -4591.25      | -0.353     | -32081.83    | -4591.28       |
| Eu(F <sub>2</sub> BTPPhen)(NO <sub>3</sub> ) <sub>3</sub>  | -0.885   | -13248.23  | -11077.11   | -2170.59      | -0.350     | -11076.73    | -2170.62       |
| Am(F <sub>2</sub> BTPPhen)(NO <sub>3</sub> ) <sub>3</sub>  | -1.028   | -34253.31  | -32082.21   | -2170.42      | -0.358     | -32081.83    | -2170.45       |
| Eu(Cl <sub>2</sub> BTPPhen)(NO <sub>3</sub> ) <sub>3</sub> | -0.883   | -13972.86  | -11077.11   | -2895.22      | -0.345     | -11076.73    | -2895.25       |
| Am(Cl <sub>2</sub> BTPPhen)(NO <sub>3</sub> ) <sub>3</sub> | -0.882   | -34977.94  | -32082.21   | -2895.20      | -0.357     | -32081.83    | -2895.23       |
| Eu(Br <sub>2</sub> BTPPhen)(NO <sub>3</sub> ) <sub>3</sub> | -0.883   | -18288.27  | -11077.11   | -7210.62      | -0.348     | -11076.73    | -7210.66       |
| Am(Br <sub>2</sub> BTPPhen)(NO <sub>3</sub> ) <sub>3</sub> | -0.850   | -39293.33  | -32082.21   | -7210.62      | -0.357     | -32081.83    | -7210.65       |
| Eu(I <sub>2</sub> BTPPhen)(NO <sub>3</sub> ) <sub>3</sub>  | -0.887   | -27409.50  | -11077.11   | -16331.85     | -0.349     | -11076.72    | -16331.89      |
| Am(I <sub>2</sub> BTPPhen)(NO <sub>3</sub> ) <sub>3</sub>  | -0.869   | -48414.58  | -32082.21   | -16331.85     | -0.357     | -32081.83    | -16331.88      |

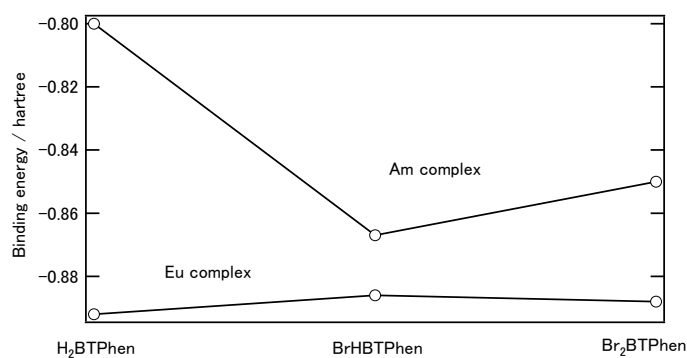

**Figure S1** Binding energy for [M(X<sub>1</sub>X<sub>2</sub>BTPPhen)(NO<sub>3</sub>)<sub>3</sub>].

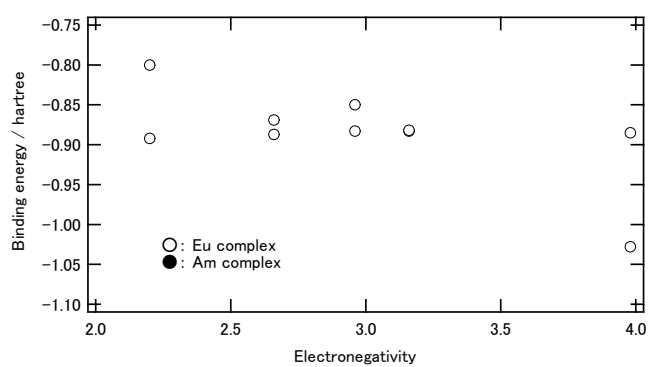

**Figure S2** Halogen effect on binding energy for  $[M(X_2BTPhen)(NO_3)_3]$  ( $X = H, F, Cl, Br,$  and  $I$ ).
